# Supplementary material
Source: MDPI journal article supplement (https://www.mdpi.com/2311-5521/2/4/56)
Supplement: s1 [file s1]

## Supplementary Material

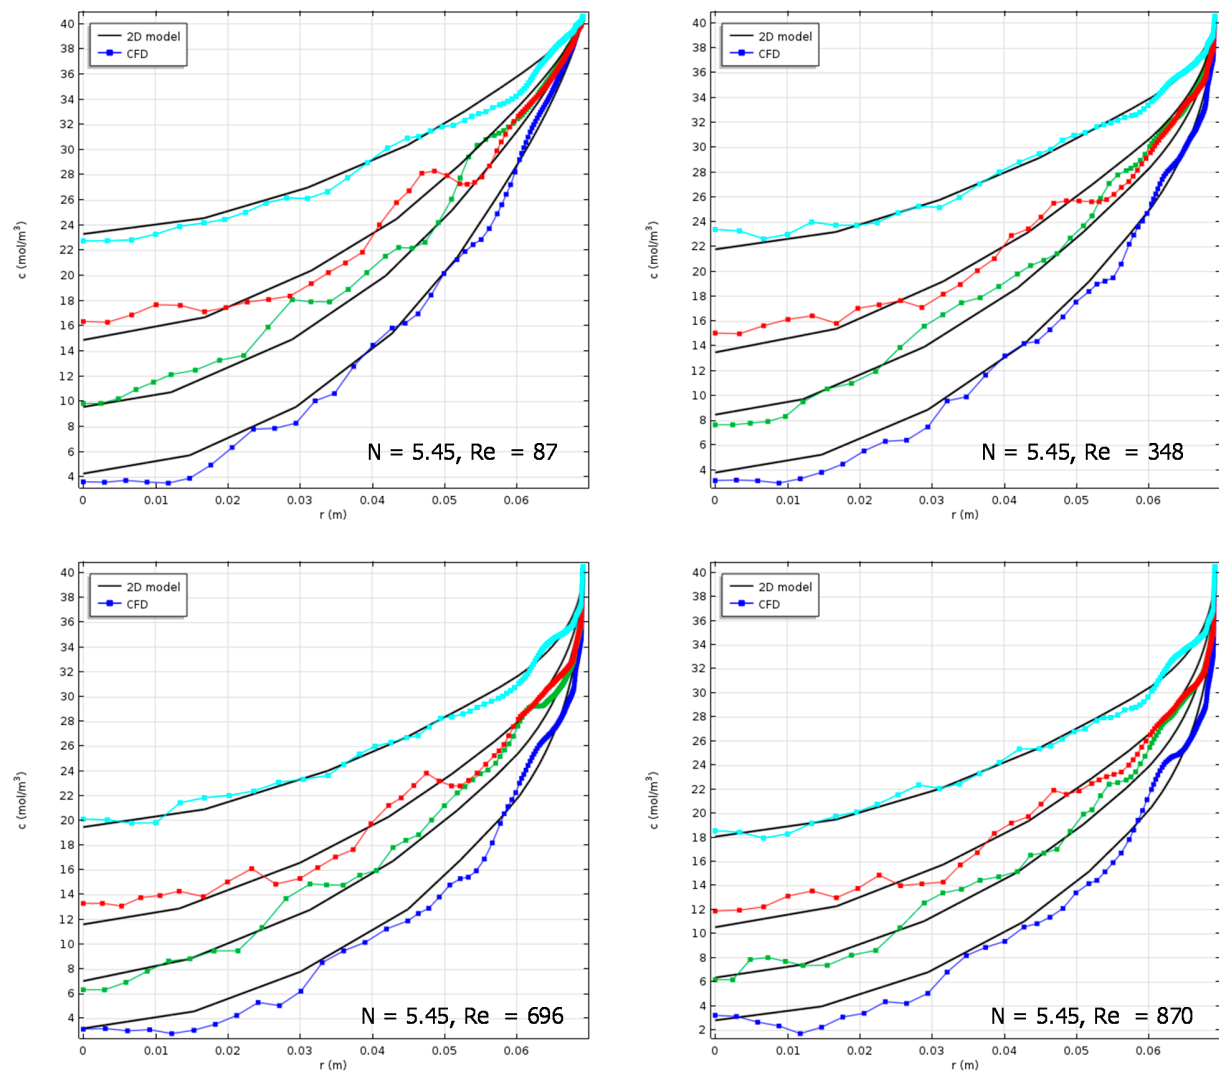

Figure S1. Results for three-parameter wall function model using  $D_T(r)$  and  $v_z(r)$  for the case  $N = 5.45$ , all four values of  $Re$ , each fitted to all four bed depths simultaneously.

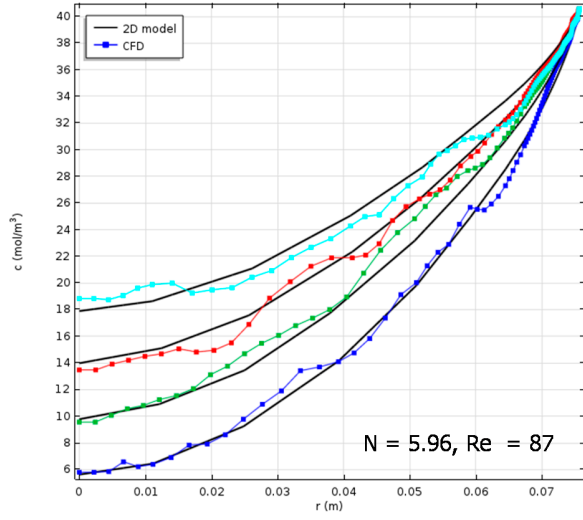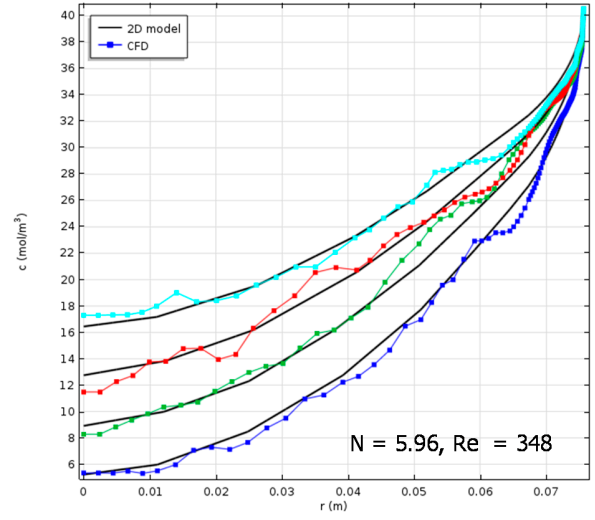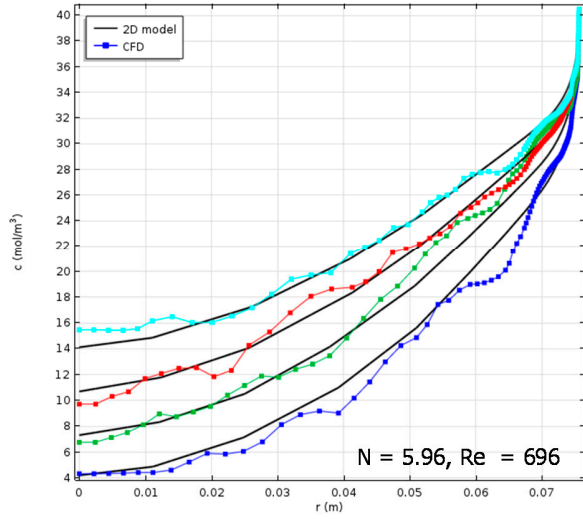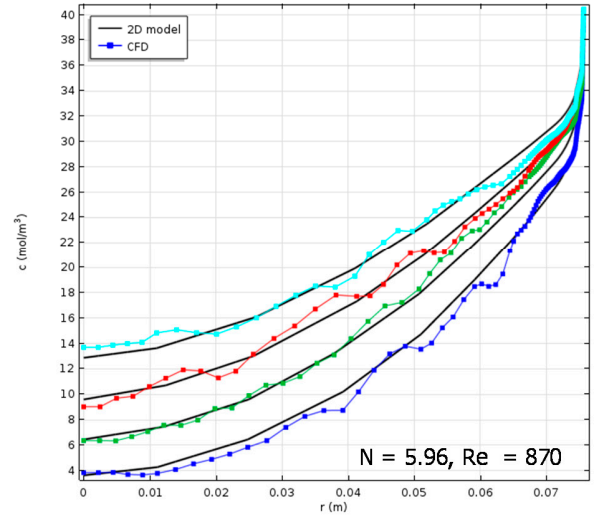

Figure S2. Results for three-parameter wall function model using  $D_T(r)$  and  $v_z(r)$  for the case  $N = 5.96$ , all four values of  $Re$ , each fitted to all four bed depths simultaneously.

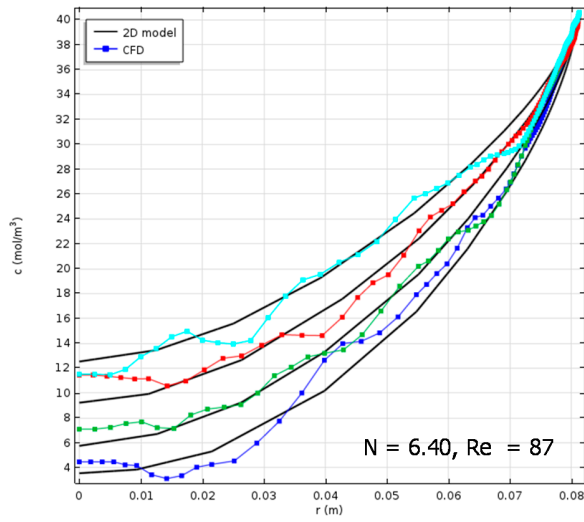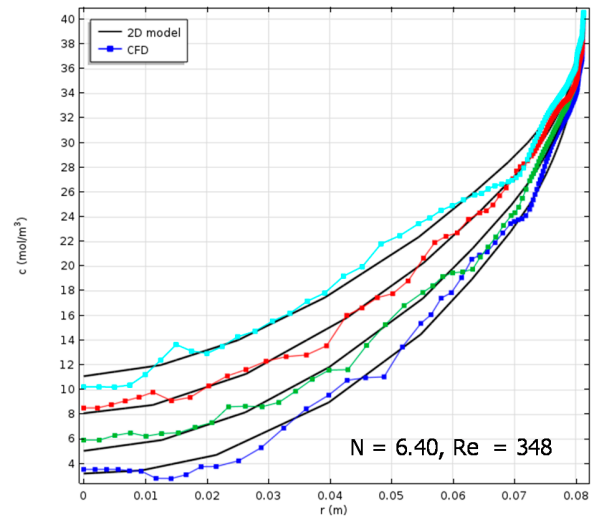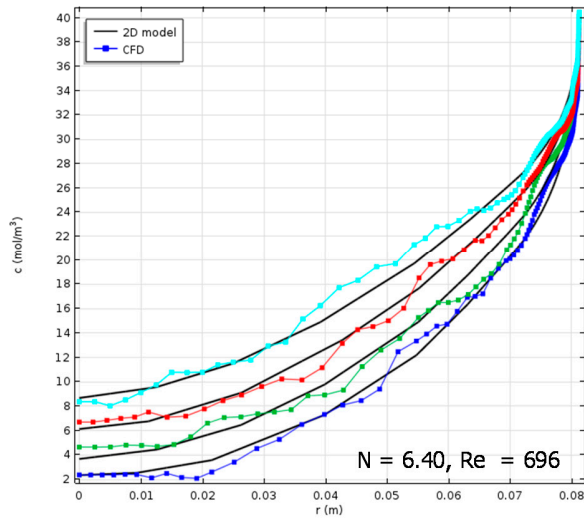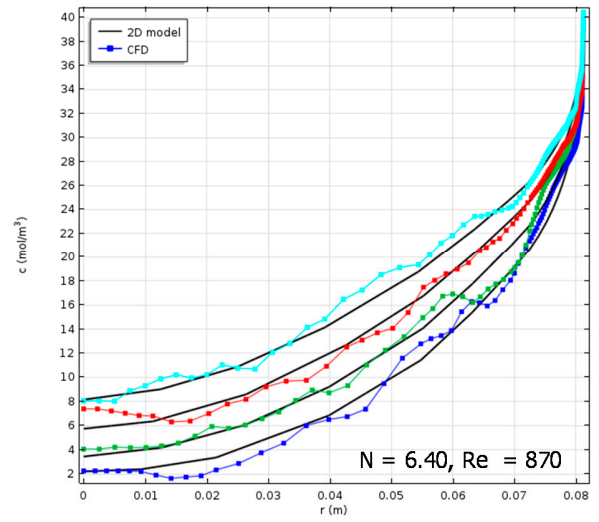

Figure S3. Results for three-parameter wall function model using  $D_T(r)$  and  $v_z(r)$  for the case  $N = 6.40$ , all four values of  $Re$ , each fitted to all four bed depths simultaneously.

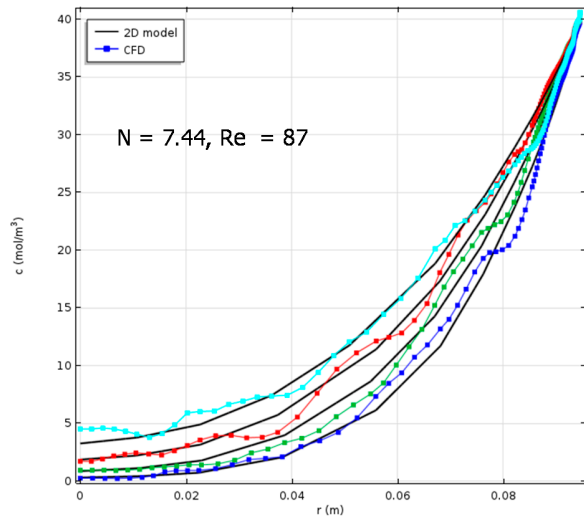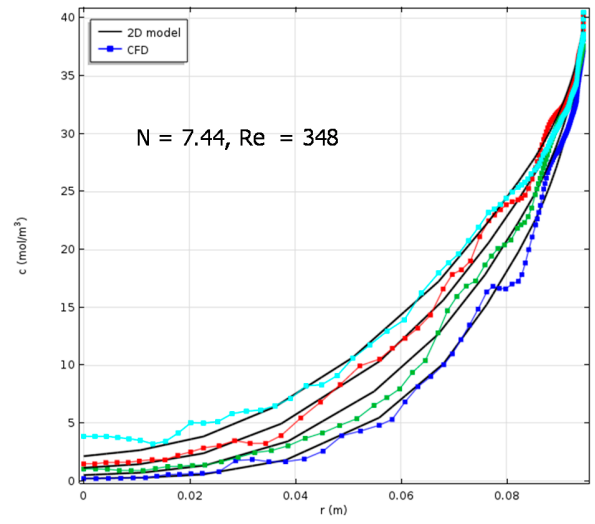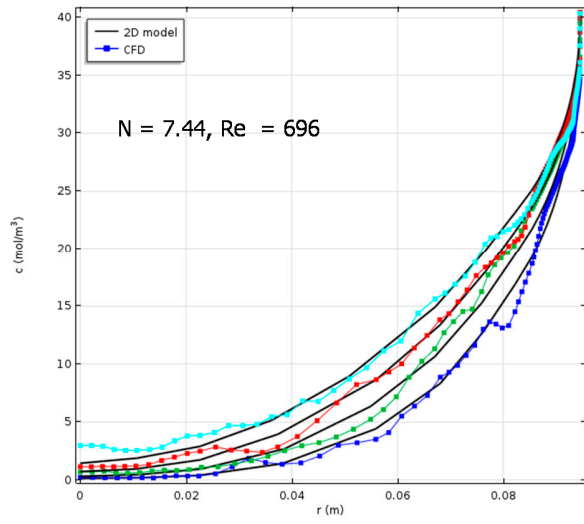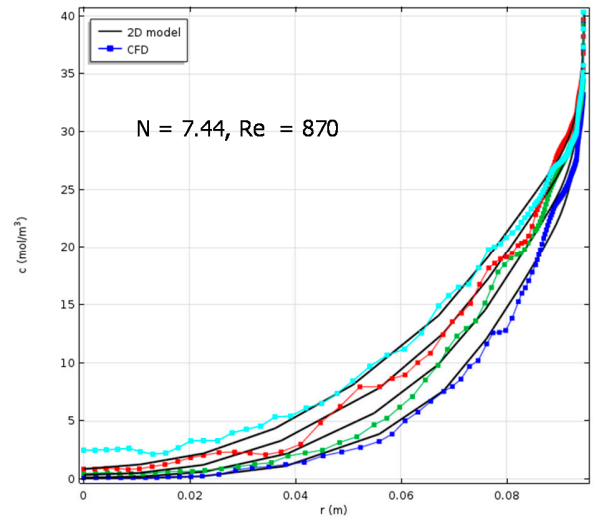

Figure S4. Results for three-parameter wall function model using  $D_T(r)$  and  $v_z(r)$  for the case  $N = 7.44$ , all four values of  $Re$ , each fitted to all four bed depths simultaneously.

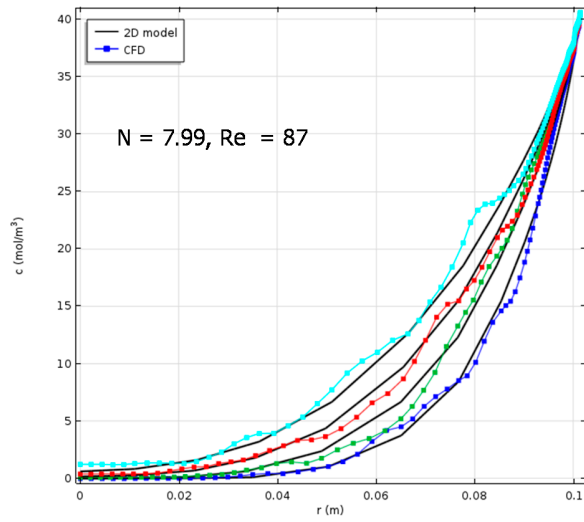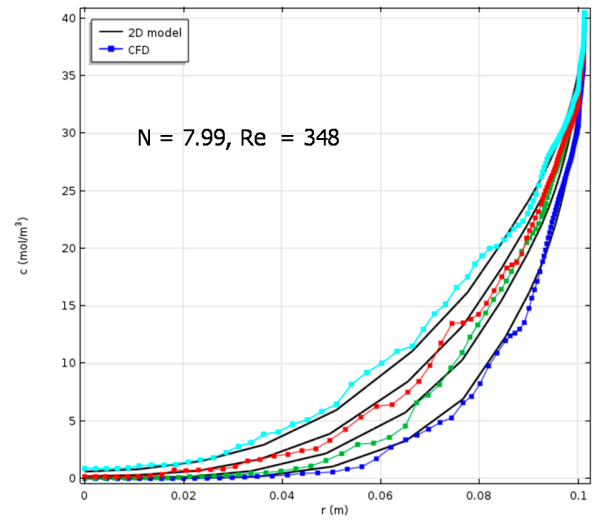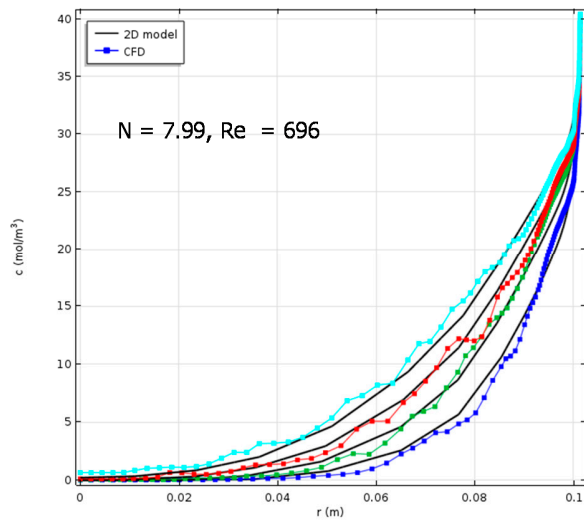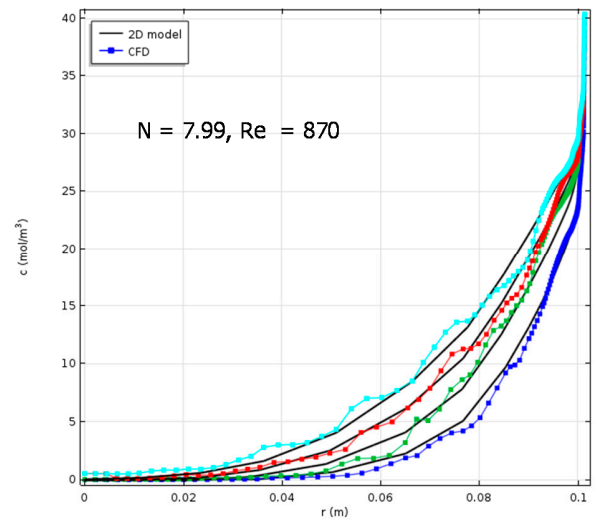

Figure S5. Results for three-parameter wall function model using  $D_T(r)$  and  $v_z(r)$  for the case  $N = 7.99$ , all four values of  $Re$ , each fitted to all four bed depths simultaneously.
